# Supplementary material
Source: PubMed Central journal article supplement (PMC3023207)
Supplement: supp_00514.2010_endo_figS2.pdf [file supp_00514.2010_endo_figS2.pdf]

Supplemental figure 2.- Córdoba Chacón *et al.*

1  
2  
3  
4  
5  
6  
7  
8  
9  
10  
11  
12  
13  
14  
15  
16  
17  
18  
19  
20  
21  
22

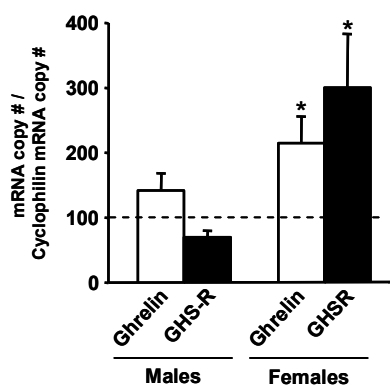

**Supplemental figure 2:** Ghrelin (white columns) and GHS-R (black columns) expression in pituitary of male and female wild-type (SST-intact controls mice shown by the dotted line set at 100%) compared to male and female SST-KO mice, as assessed by qRT-PCR. Values represent the mean  $\pm$  SEM of 4-7 mice/gender/tissue. Asterisks (\*,  $p < 0,05$ ) indicate values that significantly differ from SST-intact within gender.
