# Supplementary material
Source: PubMed Central journal article supplement (PMC3023207)
Supplement: supp_00514.2010_endo_tableS1.pdf [file supp_00514.2010_endo_tableS1.pdf]

**Supplemental table 1.- Córdoba Chacón *et al.***

1

2 **Supplemental Table-1: Mouse-specific primers for somatostatin (SST), all somatostatin receptor**  
 3 **subtypes, growth hormone (GH), ghrelin, ghrelin receptor (GHS-R) and cyclophilin-A used for**  
 4 **quantitative real-time, RT-PCR.**

5

| <b><u>Template</u></b> | <b><u>Genbank<br/>Accession #</u></b> | <b><u>Primer<br/>Sequence</u></b>                                                 | <b><u>Nucleotide<br/>Position</u></b> | <b><u>Product<br/>Size</u></b> |
|------------------------|---------------------------------------|-----------------------------------------------------------------------------------|---------------------------------------|--------------------------------|
| <b>SST</b>             | NM_009215.1                           | <b>Sense:</b> TCTGCATCGTCCTGGCTTT<br><b>Antisense:</b> CTGGCCAGTTCCTGTTTCC        | <b>Sn</b> 138<br><b>As</b> 250        | 113                            |
| <b>sst1</b>            | NM_009216                             | <b>Sense:</b> TGCCCTTTCTGGTCACTTCC<br><b>Antisense:</b> AGCGGTCCACACTAAGCACA      | <b>Sn</b> 757<br><b>As</b> 891        | 135                            |
| <b>sst2A</b>           | NM_001042606                          | <b>Sense:</b> CCCATCCTGTACGCCTTCTT<br><b>Antisense:</b> GTCTCATTAGCCGGGATTT       | <b>Sn</b> 925<br><b>As</b> 1058       | 134                            |
| <b>sst2B</b>           | NM_009217.2                           | <b>Sense:</b> TGATCCTCACCTATGCCAACA<br><b>Antisense:</b> CTGCCTTGACCAAGCAAAGA     | <b>Sn</b> 893<br><b>As</b> 997        | 105                            |
| <b>sst3</b>            | NM_009218.3                           | <b>Sense:</b> GCCTTCTTCGGCCTCTACTT<br><b>Antisense:</b> GAATGCGACGTGATGGTCTT      | <b>Sn</b> 1292<br><b>As</b> 1430      | 139                            |
| <b>sst4</b>            | NM_009219.3                           | <b>Sense:</b> AGGCTCGTGCTAATGGTGGT<br><b>Antisense:</b> GGATGAGGGACACATGGTTG      | <b>Sn</b> 860<br><b>As</b> 980        | 121                            |
| <b>sst5</b>            | NM_011425.2                           | <b>Sense:</b> ACCCCCTGCTCTATGGCTTT<br><b>Antisense:</b> GCTCTATGGCATCTGCATCCT     | <b>Sn</b> 1215<br><b>As</b> 1319      | 105                            |
| <b>sst5TMD4</b>        | GQ359775                              | <b>Sense:</b> GTCCACCCTCTCCGCTCA<br><b>Antisense:</b> GCAGGTTTCGAGAGGACATC        | <b>Sn</b> 415<br><b>As</b> 545        | 131                            |
| <b>sst5TMD2</b>        | GQ359776                              | <b>Sense:</b> CAGTTCACCCGACTGTGGCAT<br><b>Antisense:</b> CACAGCTTCAGGGTGGGTAA     | <b>Sn</b> 358<br><b>As</b> 489        | 132                            |
| <b>sst5TMD1</b>        | GQ359777                              | <b>Sense:</b> AACGTGTATATCCAGACAAGAGTGG<br><b>Antisense:</b> TCCCAGAAGACAACACCACA | <b>Sn</b> 217<br><b>As</b> 368        | 152                            |
| <b>GH</b>              | NM_008117                             | <b>Sense:</b> CCTCAGCAGGATTTTCACCA<br><b>Antisense:</b> CTTGAGGATCTGCCCAACAC      | <b>Sn</b> 412<br><b>As</b> 553        | 142                            |
| <b>Ghrelin</b>         | NM_021488.4                           | <b>Sense:</b> TCCAAGAAGCCACCAGCTAA<br><b>Antisense:</b> AACATCGAAGGGAGCATTGA      | <b>Sn</b> 163<br><b>As</b> 288        | 126                            |
| <b>GHS-R</b>           | NM_177330.3                           | <b>Sense:</b> TCAGGGACCAGAACCACAAA<br><b>Antisense:</b> CCAGCAGAGGATGAAAGCAA      | <b>Sn</b> 1002<br><b>As</b> 1072      | 71                             |
| <b>Cyclophilin A</b>   | NM_0008907.1                          | <b>Sense:</b> TGGTCTTTGGGAAGGTGAAAG<br><b>Antisense:</b> TGTCACAGTCGGAAATGGT      | <b>Sn</b> 421<br><b>As</b> 529        | 109                            |
